# Supplementary material for: Thioredoxin Reductase Activity Predicts Gold Nanoparticle Radiosensitization Effect
Source: MDPI journal article supplement (doi:10.3390/nano9020295), 2019-02-19
Supplement: s1 [file s1]

# Thioredoxin Reductase Activity Predicts Gold Nanoparticle Radiosensitization Effect

Sébastien Penninckx <sup>1</sup>, Anne-Catherine Heuskin <sup>1</sup>, Carine Michiels <sup>2,\*</sup> and Stéphane Lucas <sup>1</sup>

<sup>1</sup> Research center for the Physics of Matter and Radiation (PMR-LARN), Namur Research Institute For Life Sciences (NARILIS), University of Namur, Rue de Bruxelles 61, B-5000 Namur, Belgium; sebastien.penninckx@unamur.be (S.P.); anne-catherine.heuskin@unamur.be (A.-C.H.); stephane.lucas@unamur.be (S.L.)

<sup>2</sup> Unité de Recherche en Biologie Cellulaire (URBC), Namur Research Institute For Life Sciences (NARILIS), University of Namur, Rue de Bruxelles 61, B-5000 Namur, Belgium

\* Correspondence: carine.michiels@unamur.be; Tel.: +32-81-724131; Fax +32-81-724135

# Supplementary information

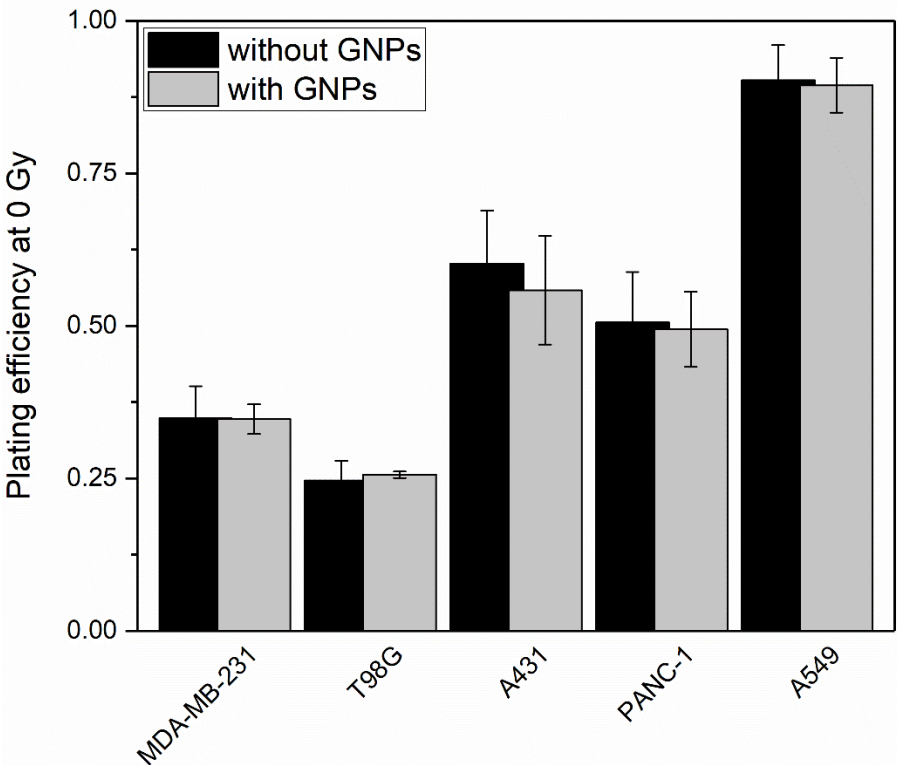

**Figure S1.** Toxicity of GNPs across the cell lines. All cells were incubated 24 h with 50  $\mu\text{g}/\text{mL}$  GNPs prior the clonogenic assay. Results were reported as mean plating efficiency  $\pm$  SEM. Results were statistically analyzed using a one-way ANOVA evidencing no significant difference (Tukey test).

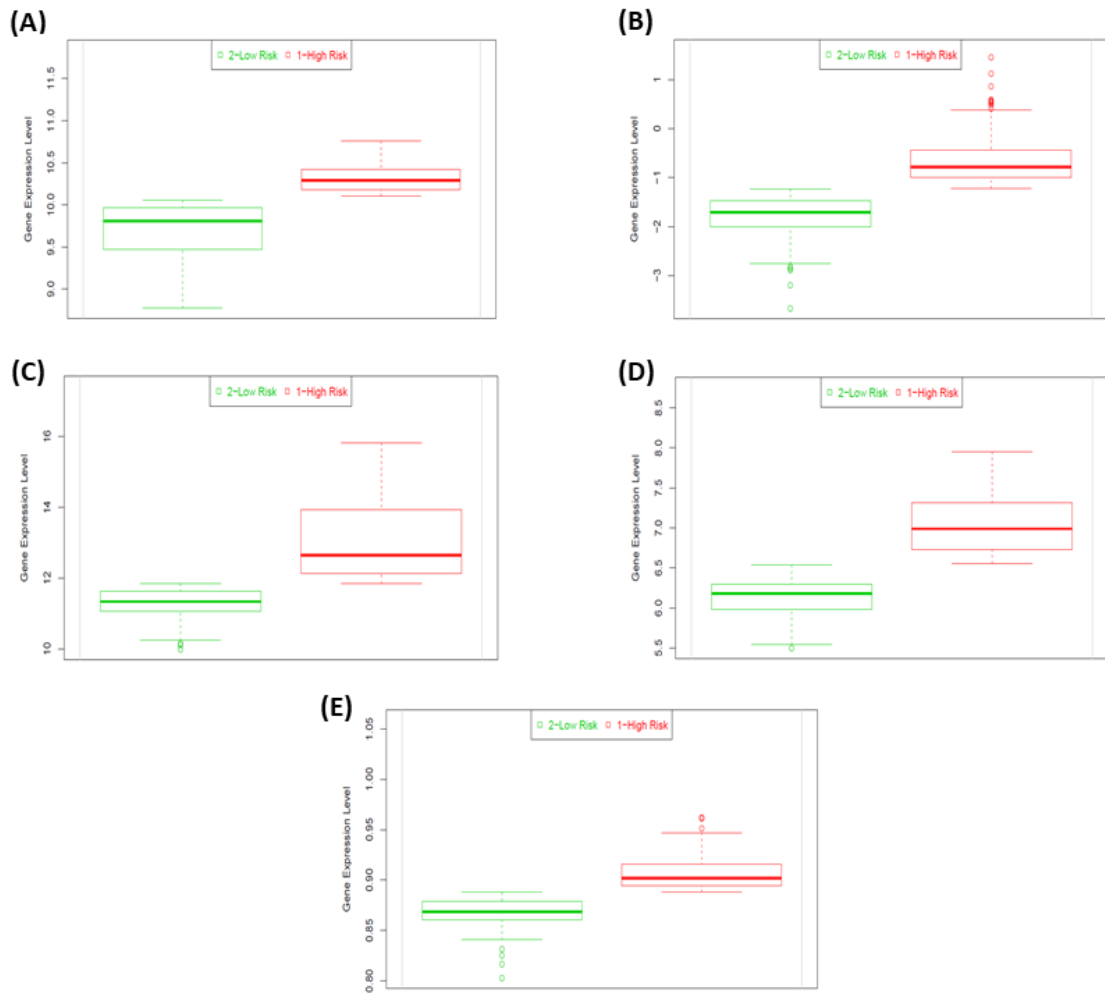

**Figure S2.** Box plot of TXRND1 mRNA expression across the two expression groups for (A) brain (GSE42669), (B) breast (TCGA-BRCA), (C) head & neck (TCGA-HNSC), (D) lung (GSE 30219) and (E) pancreas (PACA-AU) cancer datasets. P-values were calculated using t-test.
